# Supplementary material for: Loss of Mst1/2 activity promotes non-mitotic hair cell generation in the neonatal organ of Corti
Source: PubMed Central journal article supplement (PMC9592590; doi:10.1038/s41536-022-00261-4), 2022-10-25
Supplement: 41536_2022_261_MOESM2_ESM.pdf [file 41536_2022_261_MOESM2_ESM.pdf]

**Supplementary figure legends:**

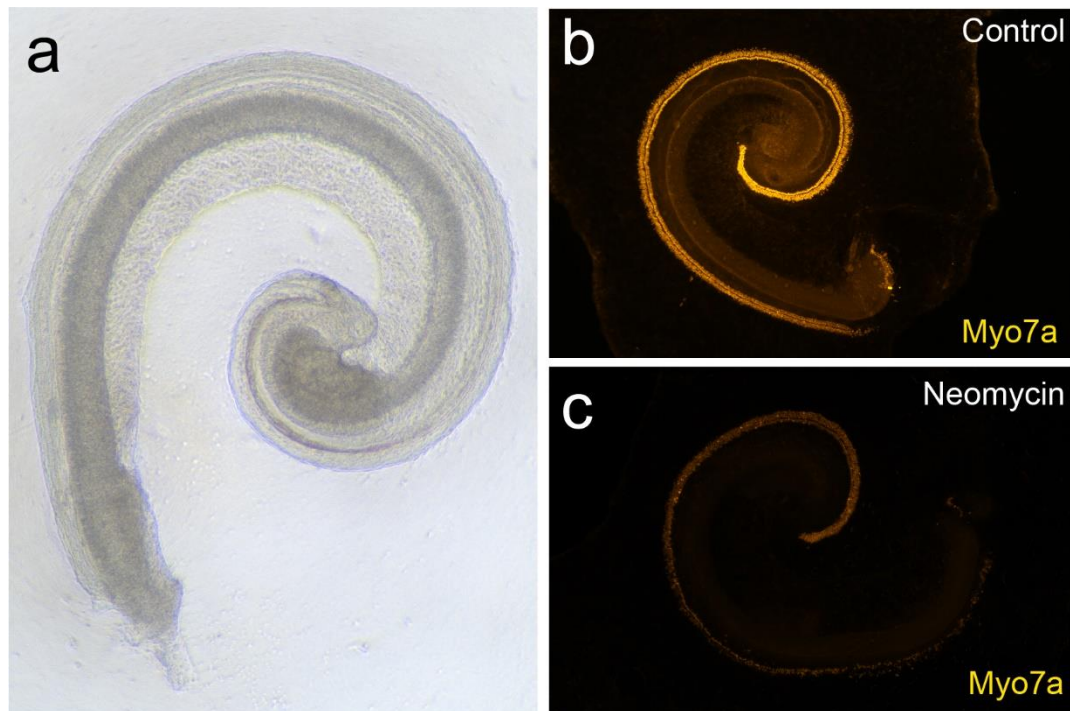

**Supplementary figure 1: Panoramic view of the cochlear explants cultured in vitro.**

*a* Morphology of a cultured cochlea from a P2 neonatal mouse under a light microscope.  
*b-c* The distribution of Myosin7a<sup>+</sup> HCs of the entire uninjured (*b*) and neomycin-treated (*c*) cochlea under a light microscope.

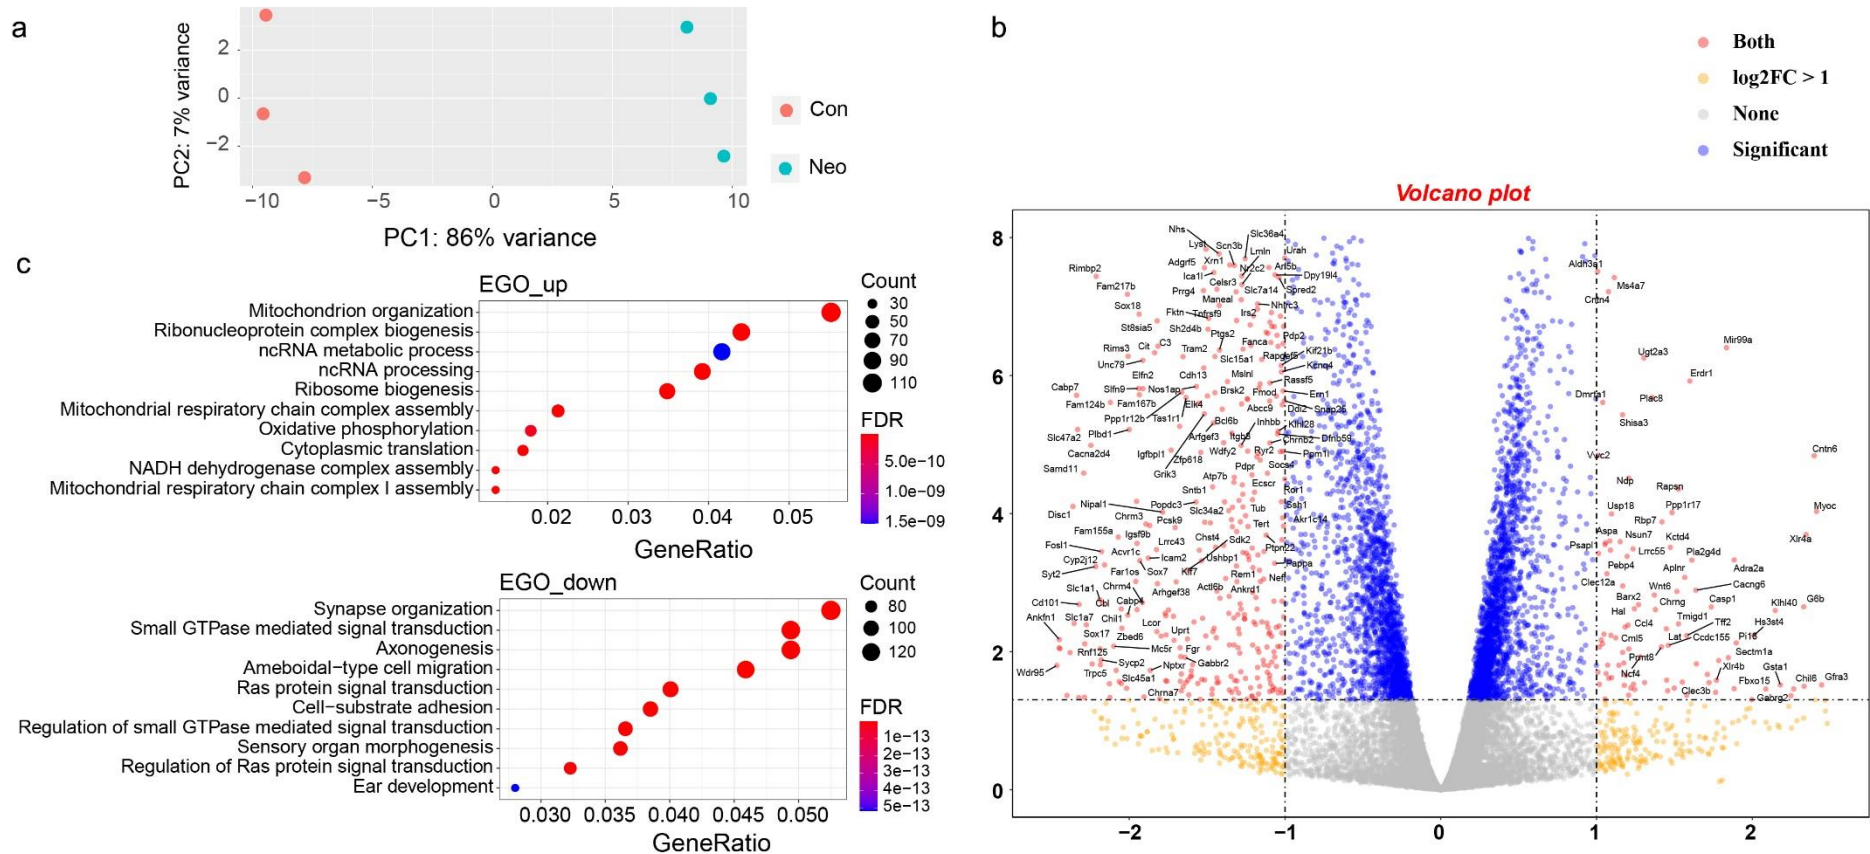

**Supplementary figure 2: Global comparison of gene expression between control and damaged neonatal mammalian cochleae *in vitro*.** *a* Principal component analysis of RNA-seq data from control and damaged cochleae demonstrated that the three replicates clustered tightly with each other (PC1 = 64%, PC2 = 21%). *b* The volcano plot showing the intersection and union of the gene expression between the two groups. *c* The top 10 GO terms for up and down-regulated genes between the two groups.

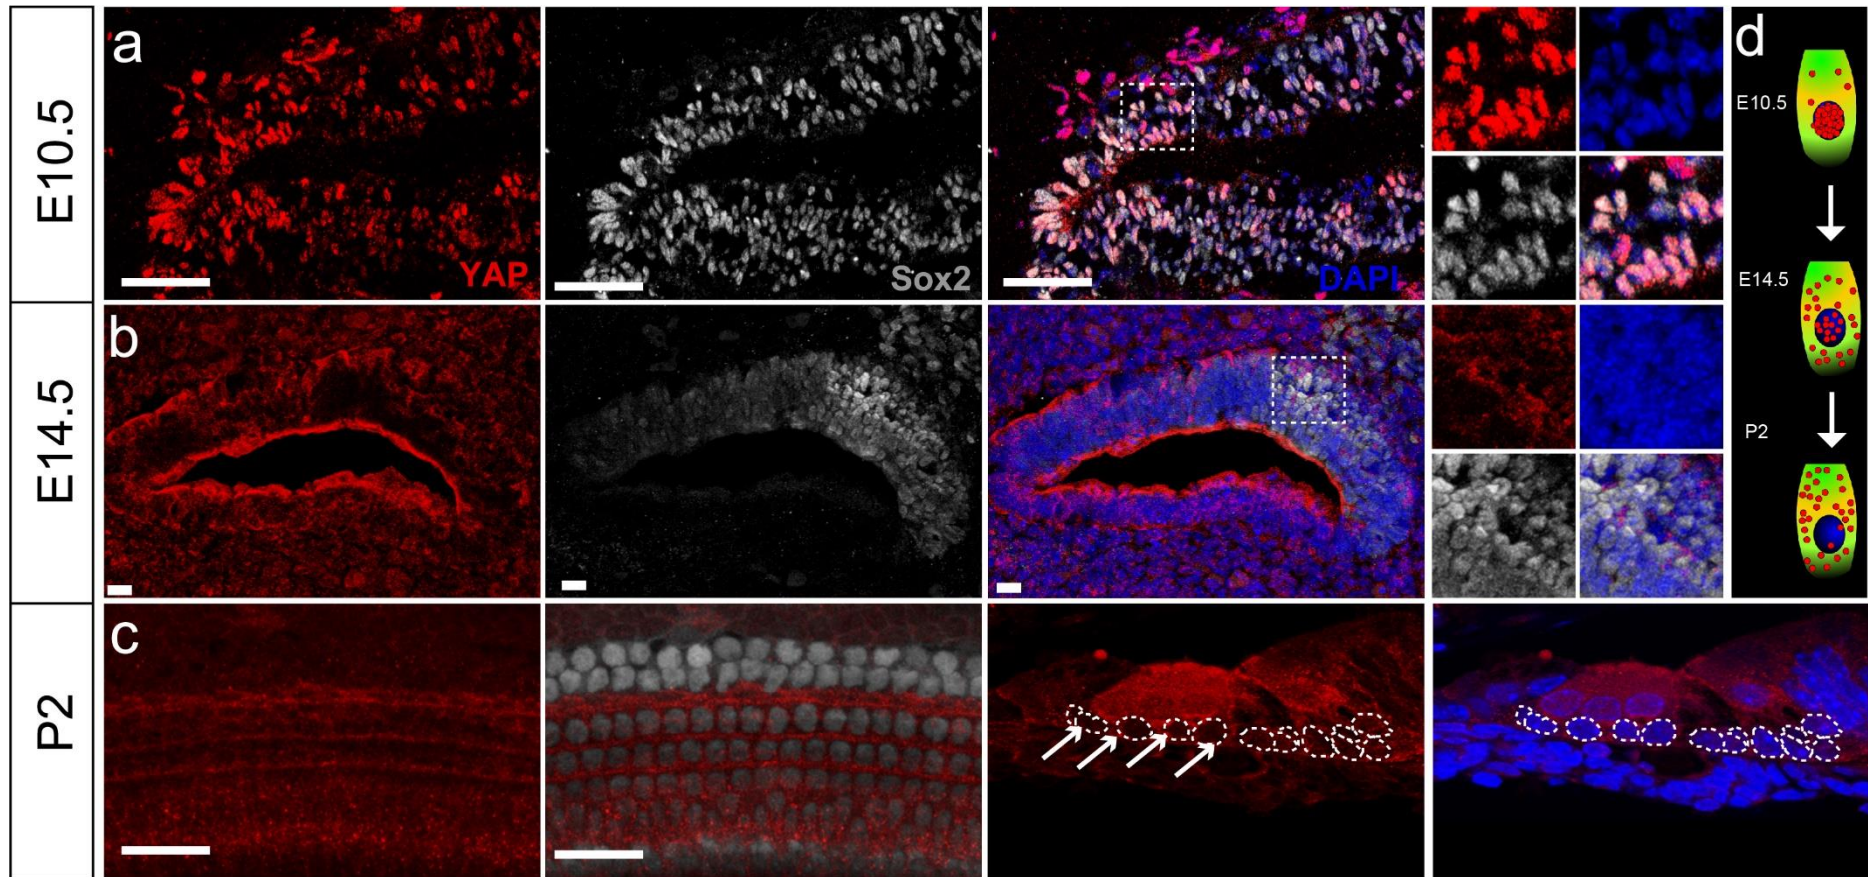

**Supplementary figure 3: The expression pattern of YAP with the development of the cochlea.** *a* YAP immunohistochemical staining at E10.5 showed significant nuclear accumulation. *b* The level of YAP nuclear distribution significantly decreased at E14.5. *c* YAP was mostly expressed in the cytoplasm of SCs at P2. *d* The schematic diagram of YAP nuclear accumulation from embryos to newborns. Scale bars = 20  $\mu$ m.



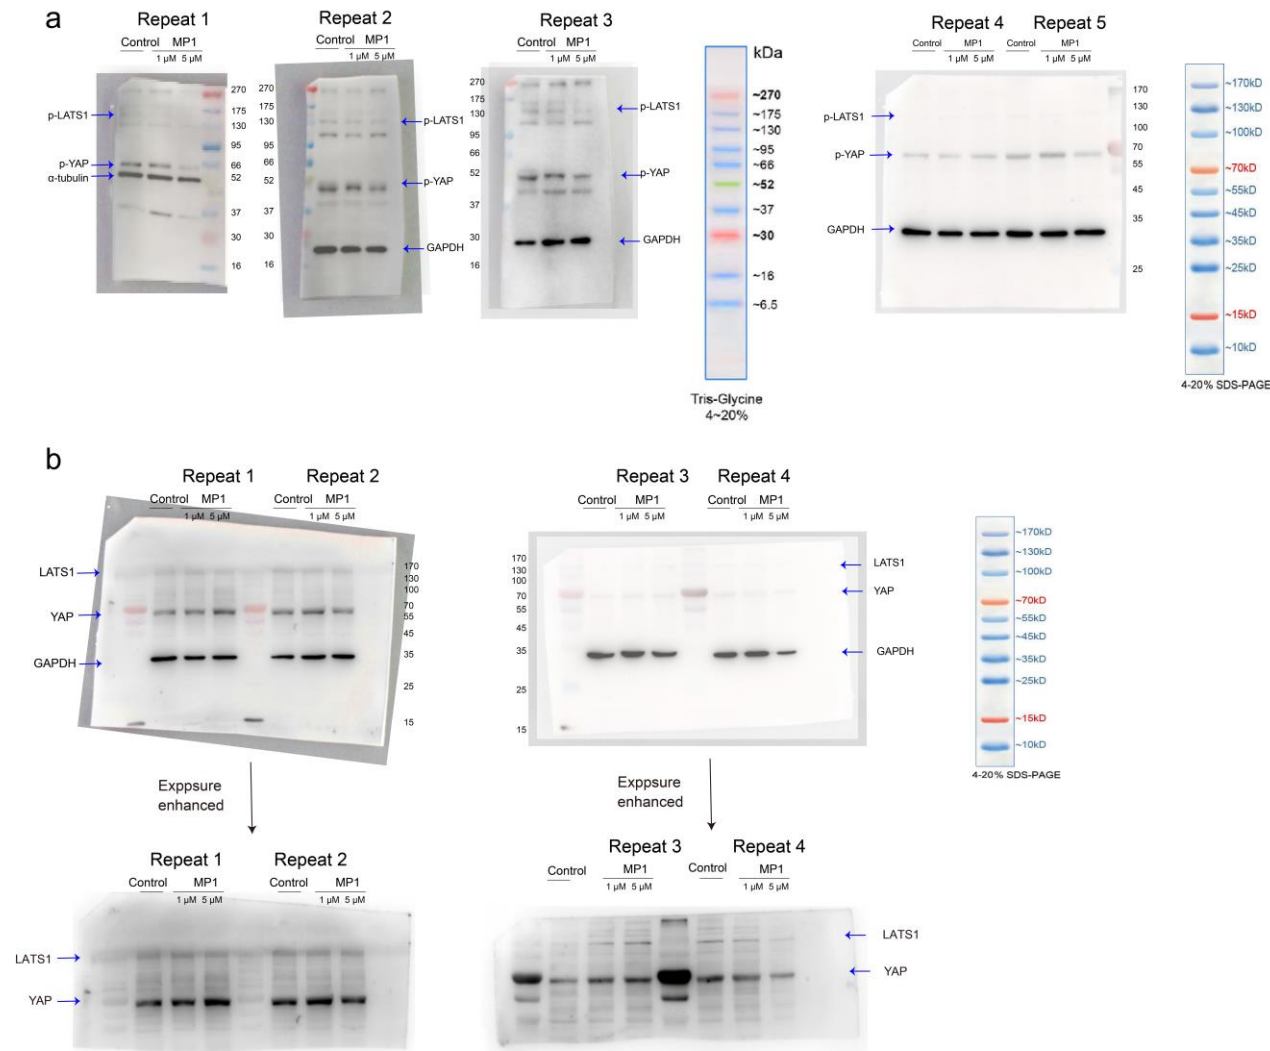

**Supplementary figure 4:** Unprocessed blots in Figure 2j used for statistical analysis. *a* Western blotting analysis was performed on extracts of control, 1  $\mu$ M, and 5  $\mu$ M XMU-MP-1-treated cochleae using p-LATS1, p-YAP, and GAPDH. Chromatograms of the molecular weight standard for color pre-dyed proteins (6.5-270 kDa). *b* Western blotting analysis was performed on extracts of control, 1  $\mu$ M, and 5  $\mu$ M XMU-MP-1-treated cochleae using LATS1, YAP, and GAPDH. Chromatograms of the molecular weight standard for color pre-dyed proteins (10-170 kDa).

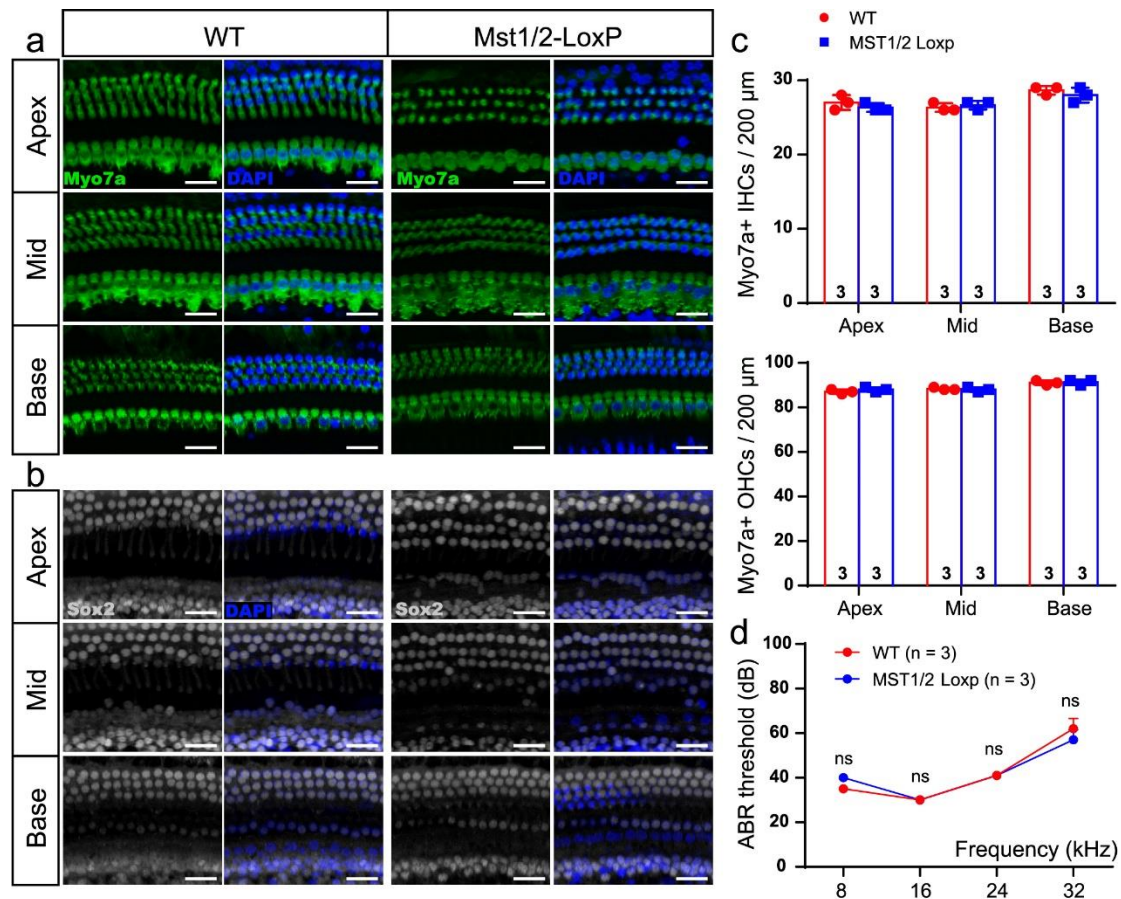

**Supplementary figure 5: Introducing *Mst1/2* loxP sites does not affect the phenotype of the cochlea or influence hearing.** *a-b* Cochleae of P25 WT and *Mst1<sup>fl/fl</sup>/Mst2<sup>fl/fl</sup>* adult mice were dissected and immunohistochemically stained. The morphologies of Myosin7a+ HC and Sox2+ SC are shown. *c* Two-way ANOVA followed by Sidak's multiple comparison test was performed and showed that there was no significant difference in the numbers of IHCs and OHCs in *MST1/2-LoxP* mice compared with the control group. *d* Auditory brainstem response (ABR) results showed no significant difference in hearing threshold in *MST1/2-LoxP* mice compared with the normal group analyzed by two-way ANOVA followed by Sidak's multiple comparison test. \* $p < 0.05$ , \*\* $p < 0.01$ , \*\*\* $p < 0.001$ , \*\*\*\* $p < 0.0001$ . Data are shown as the mean  $\pm$  SEM. Scale bars = 20  $\mu$ m.

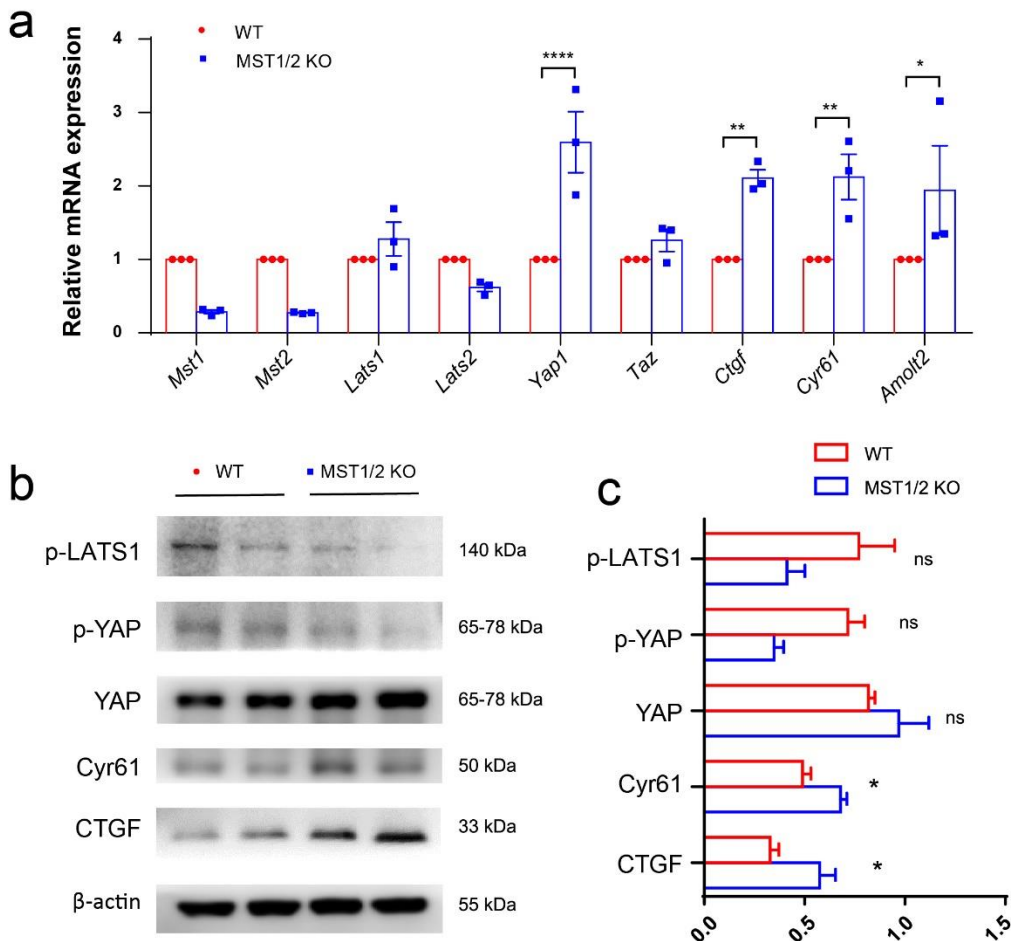

**Supplementary figure 6: MST1/2 knockout in vivo reduced endogenous LATS1 and YAP phosphorylation and affected the expression of YAP downstream genes.** *a*  $Mst1^{fl/fl}/Mst2^{fl/fl}$ ; Sox9-CreERT<sup>2/+</sup> mice were used to knock out *Mst1/2* in Sox9<sup>+</sup> SCs and thus turn off Hippo signaling in order to promote YAP nuclear translocation. Tamoxifen was injected at P1–2, and the cochleae were harvested at P7. Relative mRNA expression levels of Hippo signaling and downstream genes between  $Mst1^{fl/fl}/Mst2^{fl/fl}$ ; Sox9-CreERT<sup>2/+</sup> groups and controls are shown, and two-way ANOVA followed by Sidak’s multiple comparison test was performed to show the significant differences. *b* Western blotting analysis was performed on cochlear extracts in control and  $Mst1^{fl/fl}/Mst2^{fl/fl}$ ; Sox9-CreERT<sup>2/+</sup> mice using antibodies against p-LATS, p-YAP, YAP, CRY61, CTGF, and beta-actin. *c* Analysis performed with two-way ANOVA followed by Sidak’s multiple comparison test showed that compared with the control group the protein expression levels of p-YAP and p-LATS in the MST1/2 knockout group were decreased and the protein expression levels of CYR61 and CTGF were increased. \* $p < 0.05$ , \*\* $p < 0.01$ , \*\*\* $p < 0.001$ , \*\*\*\* $p < 0.0001$ . Data are shown as the mean  $\pm$  SEM.

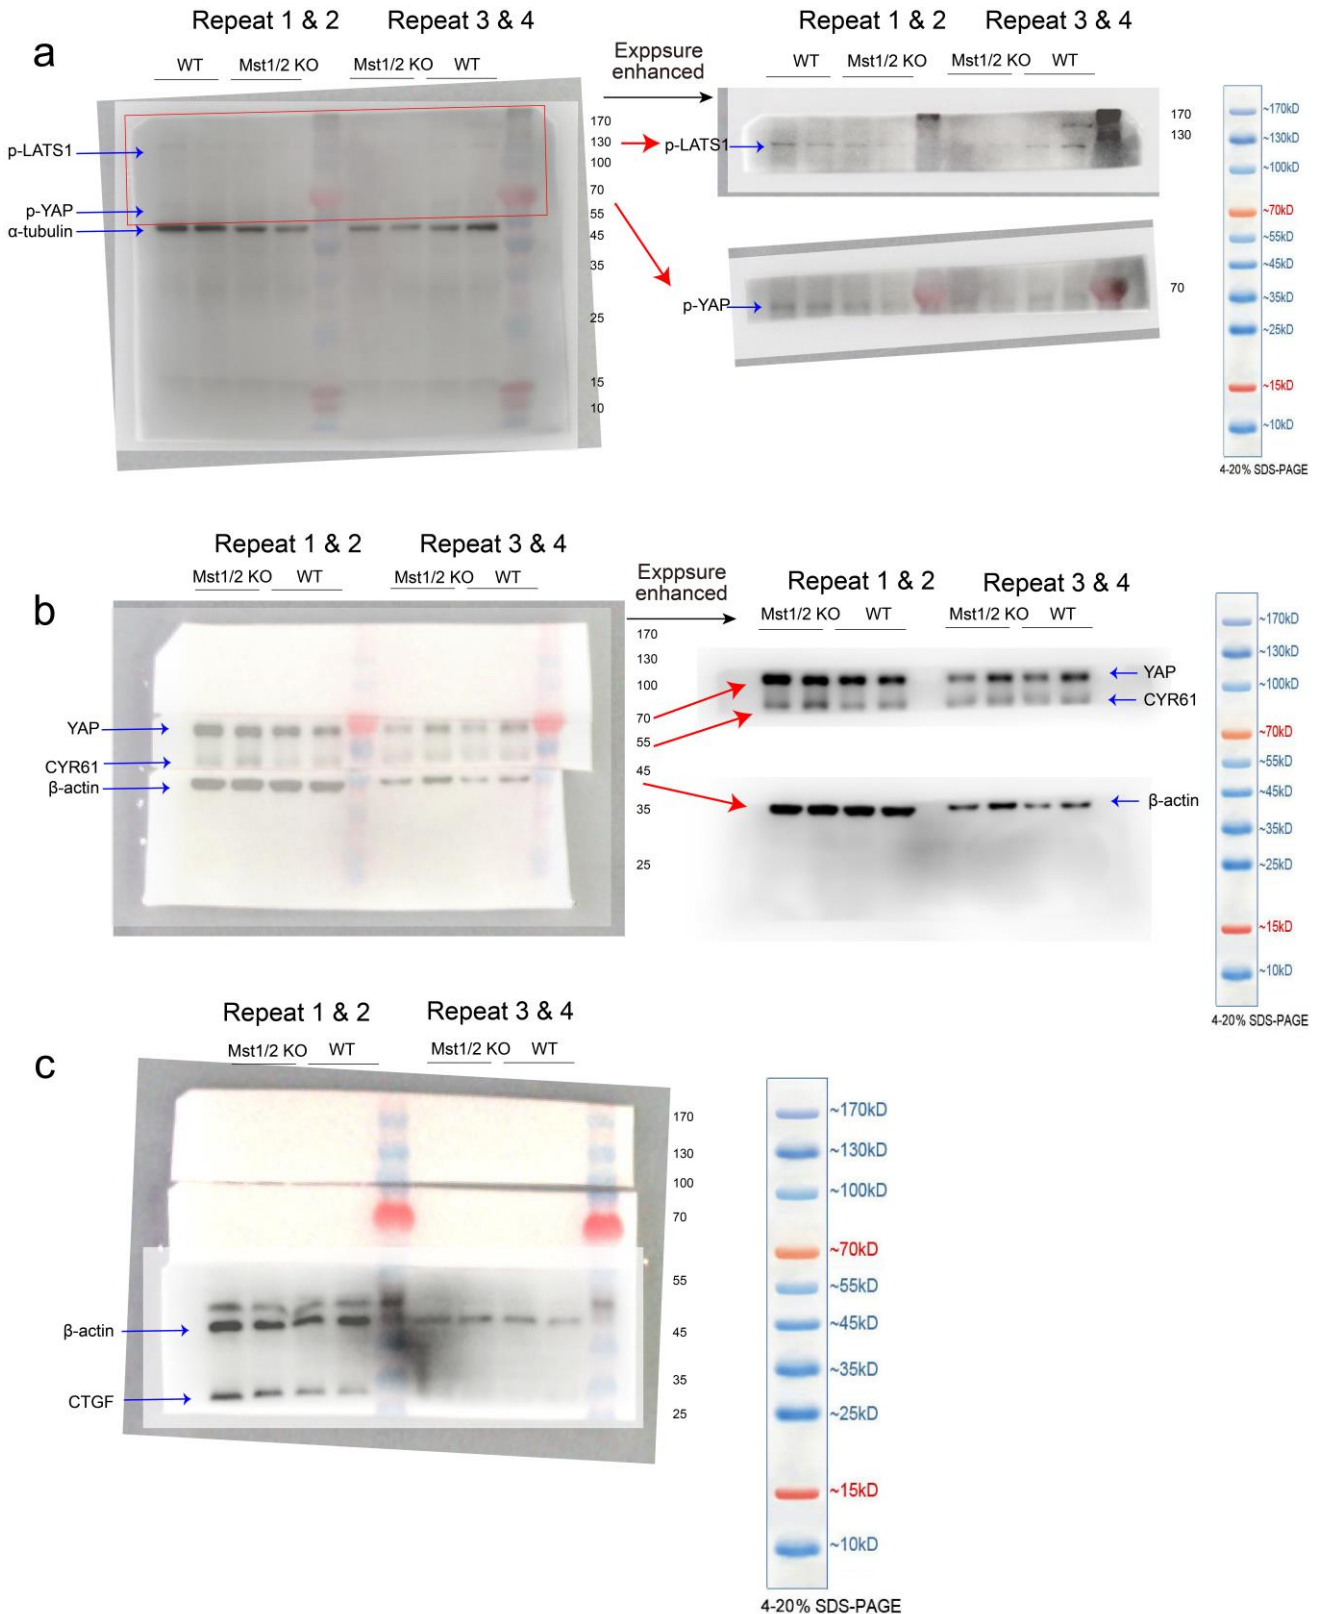

**Supplementary figure 7:** Unprocessed blots in Supplementary Figure 6b used for statistical analysis. *a* Western blotting analysis was performed on extracts of WT and *Mst1/2* KO cochleae using p-LATS1, p-YAP, and  $\alpha$ -tubulin. *b* Western blotting analysis was performed on extracts of WT and *Mst1/2* KO cochleae using YAP, CYR61 and  $\beta$ -actin. *c* Western blotting analysis was performed on extracts of WT and *Mst1/2* KO cochleae using CTGF, and  $\beta$ -actin. Chromatograms of the molecular weight standard for color pre-dyed proteins (10-170 kDa).



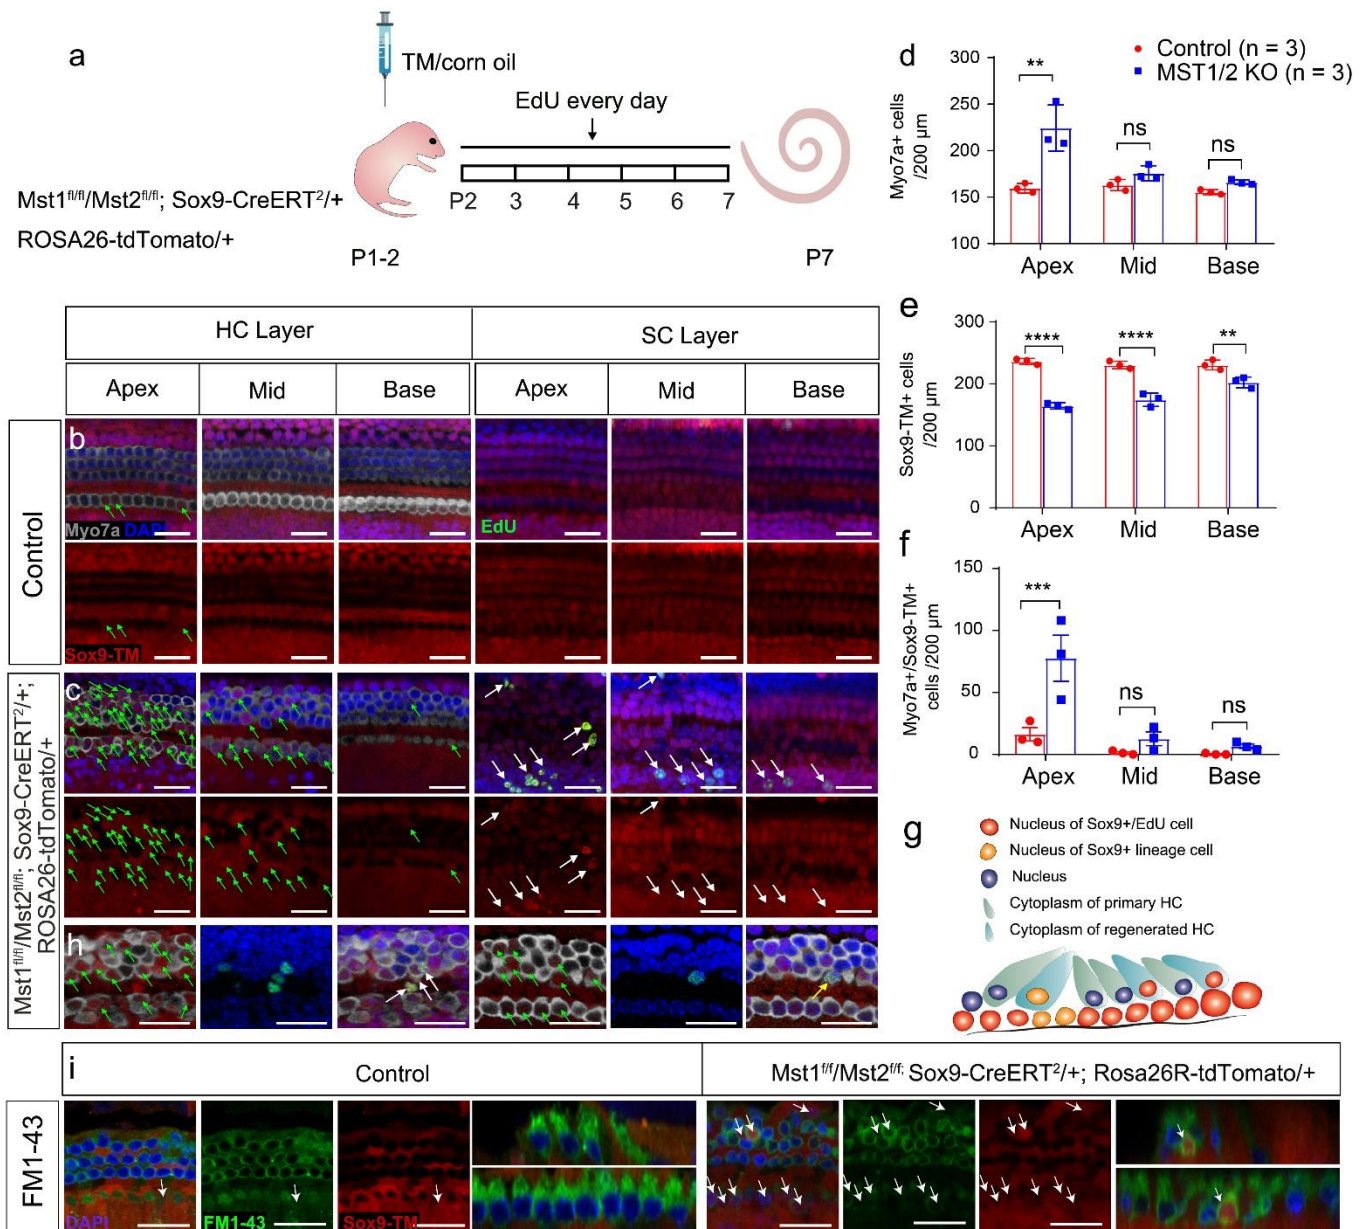

**Supplementary figure 8: Regenerated HCs induced by YAP nuclear translocation are derived from the Sox9 lineage *in vivo*.** *a*  $Mst1^{fl/fl}/Mst2^{fl/fl}; Sox9-CreERT2^{+/+}; ROSA26-tdTomato^{+/+}$  mice with tamoxifen administration at P1–2 were used to lineage trace Sox9+ supporting cells while turning off Hippo signaling. EdU was injected at P2 to P7 to detect proliferating cells. *b* In P7 control mice, Sox9-tdTomato+ cells were almost all SCs in the organ of Corti, and very few HCs (fewer than 5 per cochlea) were Sox9-tdTomato+ ( $n = 6$ ). *c* There were large numbers of Sox9-tdTomato+ HCs in both IHCs and OHCs in P7  $Mst1^{fl/fl}/Mst2^{fl/fl}; Sox9-CreERT2^{+/+}; ROSA26-tdTomato^{+/+}$  mice. *d-f* Two-way ANOVA followed by Sidak's multiple comparison test was performed and showed that compared with control groups the numbers of HCs were significantly increased and the numbers of Sox9+ SCs were significantly decreased in the SR, and large numbers of newly generated HCs were Sox9+ in the  $Mst1^{fl/fl}/Mst2^{fl/fl}; Sox9-CreERT2^{+/+}$  mice. *g* The schematic diagram of the lineage tracing of regenerated HCs. *h* Compared with the number of Sox9-tdTomato+ HCs, very few Sox9-



tdTomato+/EdU+ HCs were observed in P7  $Mst1^{fl/fl}/Mst2^{fl/fl}$ ; Sox9-CreERT<sup>2</sup>/+; ROSA26-tdTomato/+ mice, about 0–2 per cochlea. *i* Regenerated HC-like cells *in vivo* were able to uptake FM1-43FX at P7 after knockout of MST1/2 in SOX9+ SCs at P2. \* $p < 0.05$ , \*\* $p < 0.01$ , \*\*\* $p < 0.001$ , \*\*\*\* $p < 0.0001$ . Data are shown as the mean  $\pm$  SEM. Scale bars = 20  $\mu$ m.

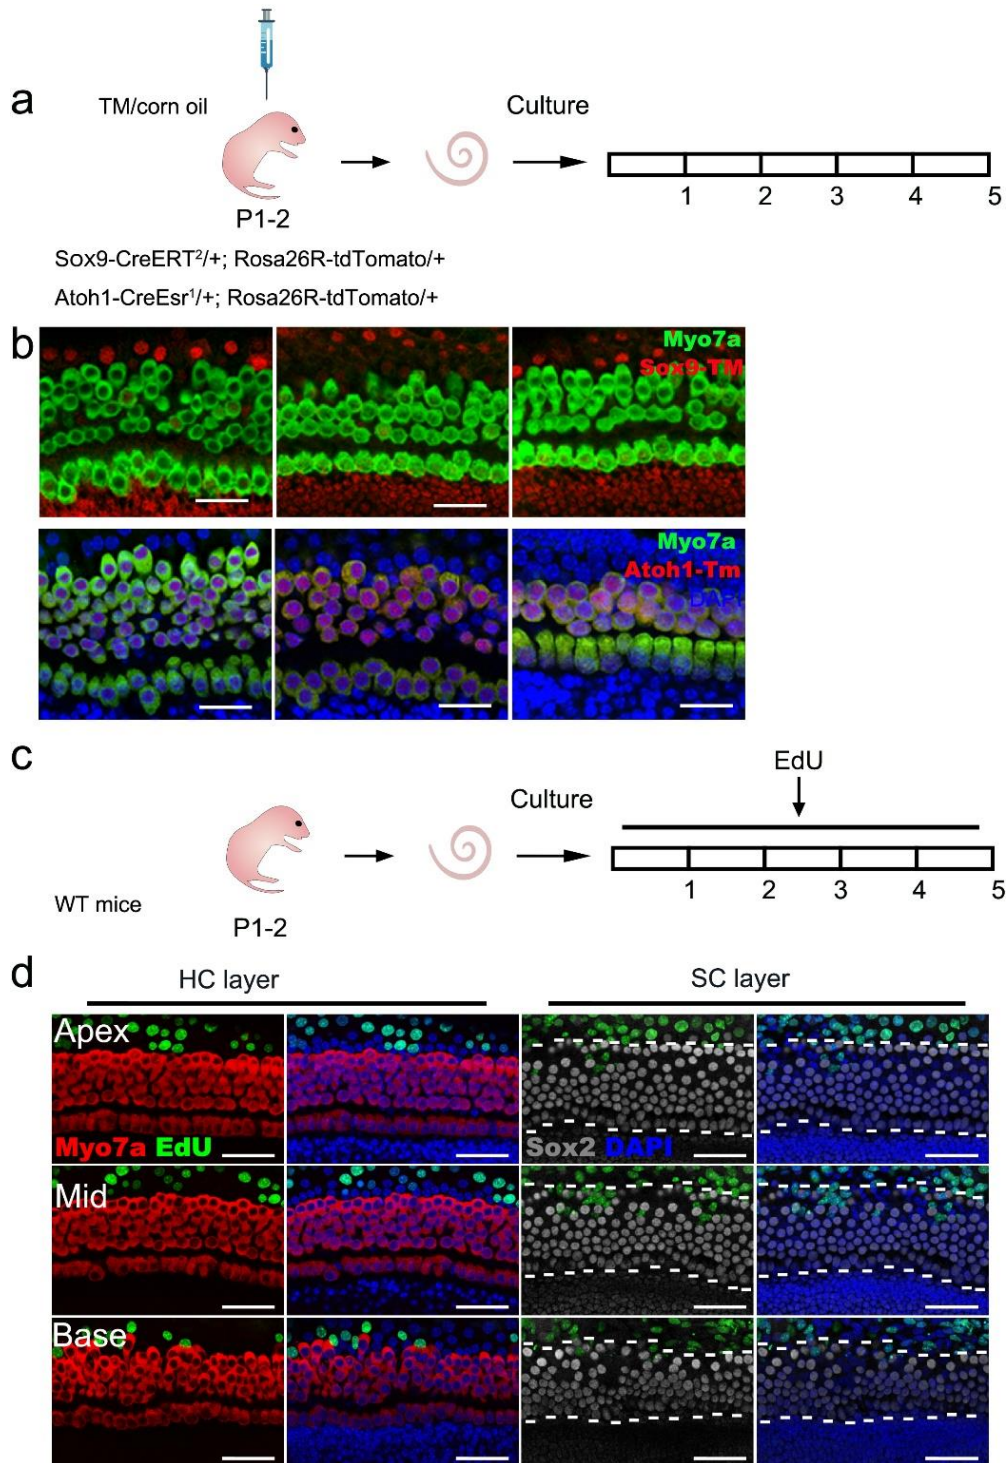

**Supplementary figure 9: The cochlear phenotypes of controls without injury.** *a* Sox9-CreERT<sup>2/+</sup>; Rosa26R-tdTomato/+ and Atoh1-CreEsr<sup>1/+</sup>; Rosa26R-tdTomato/+ mouse models were used to trace the SC and HC lineages. Tamoxifen was injected at P1 to activate tdTomato expression overnight, and the cochleae were harvested at P2 and then cultured in vitro for 5 days. *b* The distribution of Sox9-tdTomato<sup>+</sup> cells and Atoh1-tdTomato<sup>+</sup> cells from the apex to the base in the HC layer. *c* The cochlear explants from P2 WT mice were harvested and then cultured for 5 days, and 10  $\mu$ M EdU was added the whole time to trace the proliferating cells. *d* No EdU<sup>+</sup> HCs and only rare EdU<sup>+</sup> SCs in the SR were observed. Scale bars = 20  $\mu$ m.

Sup Table1: Organisms/Strains

|                                                  |                     |              |
|--------------------------------------------------|---------------------|--------------|
| Mouse: Mst1 <sup>fl</sup> and Mst2 <sup>fl</sup> | Boan Li' laboratory | Cat. #017635 |
| Mouse: Rosa26R-tdTomato                          | Jackson Laboratory  | Cat. #7908   |
| Mouse: Sox9-CreERT <sup>2</sup>                  | Jackson Laboratory  | Cat. #035092 |
| Mouse: Atoh1-Cre/Esr <sup>1</sup>                | Jackson Laboratory  | Cat.#007684  |

Sup Table2: Genotyping primers

|                         |                                   |
|-------------------------|-----------------------------------|
| CreER transgene forward | GCG GTC TGG CAG TAA AAA CTA TC    |
| CreER transgene reverse | GTG AAA CAG CAT TGC TGT CAC TT    |
| CreER internal forward  | CTA GGC CAC AGA ATT GAA AGA TCT   |
| CreER internal reverse  | GTA GGT GGA AAT TCT AGC ATC ATC C |
| tomato WT forward       | AAG GGA GCT GCA GTG GAG TA        |
| tomato WT reverse       | CCG AAA ATC TGT GGG AAG TC        |
| tomato mutant reverse   | GGC ATT AAA GCA GCG TAT CC        |
| tomato mutant forward   | CTG TTC CTG TAC GGC ATG G         |
| <i>Mst1</i> -F          | AGTGTTGGCTCTTGATTTTCCT            |
| <i>Mst1</i> -R          | CAGGGCTAGAGTGAAACCTTG             |
| <i>Mst2</i> -F          | CACACACACACACGGTCTCA              |
| <i>Mst2</i> -R          | CCTCCCAGCCTTCCTCTAGT              |

Sup Table3: Primer pairs for qPCR

|               |                |                         |
|---------------|----------------|-------------------------|
| <i>Mst1</i>   | Forward Primer | CTCACCCTGAATGACTTCCAG   |
|               | Reverse Primer | AAGGCCCGACAGTCCAGAA     |
| <i>Mst2</i>   | Forward Primer | CGGAGTTACGTGAAAGTTGGT   |
|               | Reverse Primer | CAGAAAGAAGGGCCGAATGGA   |
| <i>Lats1</i>  | Forward Primer | AAAGCCAGAAGGGTACAGACA   |
|               | Reverse Primer | CCTCAGGGATTCTCGGATCTC   |
| <i>Lats2</i>  | Forward Primer | GGACCCAGGAATGAGCAG      |
|               | Reverse Primer | CCCTCGTAGTTTGCACCACC    |
| <i>Yap</i>    | Forward Primer | TACTGATGCAGGTACTGCGG    |
|               | Reverse Primer | TCAGGGATCTCAAAGGAGGAC   |
| <i>Taz</i>    | Forward Primer | CCCCCGCTTTGGACAGAAAAT   |
|               | Reverse Primer | AGGCTGGAAATGATTGTGGAG   |
| <i>Psx1</i>   | Forward Primer | CTGGCTCAACTGCGGTACAG    |
|               | Reverse Primer | ACCAATTCTGCACATCACATTCA |
| <i>Ctnnb1</i> | Forward Primer | ATGGAGCCGGACAGAAAAGC    |
|               | Reverse Primer | CTTGCCACTCAGGGAAGGA     |
| <i>Wnt3a</i>  | Forward Primer | CTCCTCTCGGATACCTCTTAGTG |
|               | Reverse Primer | GCATGATCTCCACGTAGTTCCTG |
| <i>Brn3.1</i> | Forward Primer | ATGCGCCGAGTTTGTCTCC     |
|               | Reverse Primer | GGGCTTGAACGGATGGTTCT    |
| <i>Axin2</i>  | Forward Primer | TGACTCTCCTTCCAGATCCCA   |
|               | Reverse Primer | TGCCACACTAGGCTGACA      |



|               |                |                        |
|---------------|----------------|------------------------|
| <i>Sox2</i>   | Forward Primer | GCGGAGTGGAAACTTTTGTCC  |
|               | Reverse Primer | CGGGAAGCGTGTACTTATCCTT |
| <i>Hes1</i>   | Forward Primer | CCAGCCAGTGTCAACACGA    |
|               | Reverse Primer | AATGCCGGGAGCTATCTTTCT  |
| <i>Hes5</i>   | Forward Primer | AGTCCCAAGGAGAAAAACCGA  |
|               | Reverse Primer | GCTGTGTTTCAGGTAGCTGAC  |
| <i>Jag1</i>   | Forward Primer | CCTCGGGTCAGTTTGAGCTG   |
|               | Reverse Primer | CCTTGAGGCACACTTTGAAGTA |
| <i>Notch1</i> | Forward Primer | CCCTTGCTCTGCCTAACGC    |
|               | Reverse Primer | GGAGTCCTGGCATCGTTGG    |
| <i>Cyr61</i>  | Forward Primer | CTGCGCTAAACAACCTCAACGA |
|               | Reverse Primer | GCAGATCCCTTTCAGAGCGG   |
| <i>Ctgf</i>   | Forward Primer | GGGCCTCTTCTGCGATTTT    |
|               | Reverse Primer | ATCCAGGCAAGTGCATTGGTA  |
| <i>Actg1</i>  | Forward Primer | AATCGCCGCACTCGTCATT    |
|               | Reverse Primer | CCCTACGATGGAAGGGAACAC  |
| <i>Amotl2</i> | Forward Primer | GGAGAAGAGTTGCCACCTAT   |
|               | Reverse Primer | TCGAAGAGCTTCATCCTGTCC  |
| <i>Atoh1</i>  | Forward Primer | GAGTGGGCTGAGGTAAAAGAGT |
|               | Reverse Primer | GGTCGGTGCTATCCAGGAG    |

Sup Table4: Antibodies and reagents

| Name                                               | Cat. NO    | Company        | Source                                       |
|----------------------------------------------------|------------|----------------|----------------------------------------------|
| DMEM/F12 medium                                    | SH30023.01 | Hyclone        | GE Healthcare Life Science, Logan, Utah, USA |
| N2                                                 | A1370701   | Gibco          | Life Technologies, Grand Island, NY, USA     |
| B27                                                | 12587010   | Gibco          | Life Technologies, Grand Island, NY, USA     |
| Ampicillin Sodium Solution                         | B540722    | Sangon Biotech | Sangon Biotech, Shanghai, China              |
| tamoxifen                                          | T5848      | Sigma          | Sigma-Aldrich, St. Louis, MO, USA            |
| TRIzol                                             | 15596018   | Ambion         | Life Technologies, Carlsbad CA, USA          |
| RIPA                                               | P0013B     | Beyotime       | Beyotime Biotechnology, China                |
| PMSF                                               | ST506      | Beyotime       | Beyotime Biotechnology, China                |
| Bicinchoninic acid (BCA) protein kit               | P0012S     | Beyotime       | Beyotime Biotechnology, China                |
| BeyoGel™ Plus Precast PAGE Gel for Tris-Gly System | P0468S     | Beyotime       | Beyotime Biotechnology, China                |
| Polyvinylidene difluoride                          | FFP26      | Beyotime       | Beyotime Biotechnology,                      |

|                                               |           |  |                     |  |                                                  |
|-----------------------------------------------|-----------|--|---------------------|--|--------------------------------------------------|
| (PVDF) membranes                              |           |  |                     |  | China                                            |
| Viagen DirectPCR DNA Extraction System        | 102-T     |  | Viagen              |  | VIAGEN BIOTECH, Los Angeles, CA, USA             |
| PrimeScript™ II 1st Strand cDNA Synthesis Kit | 6210A     |  | Takara              |  | Takara Bio, Nojihigashi, Kusatsu, Shiga, Japan   |
| TB Green™ Premix Ex Taq™ II                   | RR820A    |  | Takara              |  | Takara Bio, Nojihigashi, Kusatsu, Shiga, Japan   |
| Cell-Tak                                      | 354241    |  | Corning             |  | Corning, NY, USA                                 |
| Neomycin                                      | N6386     |  | Sigma               |  | Sigma-Aldrich, St. Louis, MO, USA                |
| XMU-MP-1                                      | S8334     |  | Selleck             |  | Sigma-Aldrich, St. Louis, MO, USA                |
| 6-bromindirubin-3'-oxime                      | 361550    |  | Sigma               |  | Sigma-Aldrich, St. Louis, MO, USA                |
| DAPT                                          | 565784    |  | Sigma               |  | Sigma-Aldrich, St. Louis, MO, USA                |
| Rabbit anti-myosin7a                          | 25-6790   |  | Proteus Biosciences |  | Proteus Biosciences, Ramona, CA, USA             |
| Goat anti-Sox2                                | AF2018    |  | R&D                 |  | R&D System, Minneapolis, MN, USA                 |
| Rabbit anti-YAP                               | 14074     |  | CST                 |  | Cell Signaling Technology, Danvers, MA, USA      |
| Rabbit anti-Phospho-YAP (Ser127) (D9W2I)      | 13008S    |  | CST                 |  | Cell Signaling Technology, Danvers, MA, USA      |
| Rabbit anti-LATS1(C66B5)                      | 3477S     |  | CST                 |  | Cell Signaling Technology, Danvers, MA, USA      |
| Rabbit anti-Phospho-LATS1 (Thr1079) (D57D3)   | 8654S     |  | CST                 |  | Cell Signaling Technology, Danvers, MA, USA      |
| Goat anti-CTGF                                | SC-14939  |  | Santa Cruz          |  | Santa Cruz Biotechnology, Dallas, USA            |
| Rabbit anti-Cyr61                             | SC-13100  |  | Santa Cruz          |  | Santa Cruz Biotechnology, Dallas, USA            |
| Mouse anti-Yap1                               | SC-101199 |  | Santa Cruz          |  | Santa Cruz Biotechnology, Dallas, USA            |
| Alexa Fluor™ 555 Phalloidin                   | A34055    |  | Invitrogen          |  | Life Technologies Corporation, Eugene, CA, USA   |
| Mouse anti-Tuj1                               | Ab78078   |  | Abcam               |  | Abcam, Cambridge, UK                             |
| FM1-43FX                                      | F35355    |  | Invitrogen          |  | Life Technologies Corporation, Carlsbad, CA, USA |
| DAPI                                          | D9542     |  | Sigma               |  | Sigma-Aldrich, St. Louis, MO, USA                |
| Click-iT™ EdU Imaging Kit                     | C10086    |  | Invitrogen          |  | Life Technologies                                |

Sup table 5: Number of HCs in the organ of Corti from the apex to the base under different treatment conditions (Data are shown as mean  $\pm$  SEM,  $n = 4$ ).

|              | Apex                 | Mid                  | Bas                  |
|--------------|----------------------|----------------------|----------------------|
| Neo          | 119.500 $\pm$ 5.172  | 68.500 $\pm$ 5.737   | 33.000 $\pm$ 3.697   |
| Neo+MP1      | 163.750 $\pm$ 5.360  | 111.000 $\pm$ 6.608  | 70.250 $\pm$ 3.351   |
| Neo+BIO      | 118.250 $\pm$ 11.564 | 79.250 $\pm$ 6.421   | 33.000 $\pm$ 3.916   |
| Neo+MP1+BIO  | 131.500 $\pm$ 10.492 | 76.000 $\pm$ 5.212   | 20.000 $\pm$ 2.915   |
| Neo+DAPT     | 289.500 $\pm$ 17.689 | 146.250 $\pm$ 11.757 | 82.750 $\pm$ 4.553   |
| Neo+MP1+DAPT | 354.250 $\pm$ 17.556 | 156.250 $\pm$ 15.245 | 105.000 $\pm$ 12.302 |

Sup table 6: Number of EdU+ SCs in the sensory region in the organ of Corti from the apex to the base under different treatment conditions (Data are shown as mean  $\pm$  SEM,  $n = 4$ ).

|              | Apex                 | Mid                 | Bas                |
|--------------|----------------------|---------------------|--------------------|
| Neo          | 1.000 $\pm$ 0.408    | 1.000 $\pm$ 0.577   | 0.000 $\pm$ 0.000  |
| Neo+MP1      | 3.750 $\pm$ 0.629    | 2.500 $\pm$ 0.957   | 2.500 $\pm$ 1.258  |
| Neo+BIO      | 154.500 $\pm$ 18.835 | 47.250 $\pm$ 16.665 | 20.000 $\pm$ 6.964 |
| Neo+MP1+BIO  | 6.000 $\pm$ 4.491    | 0.500 $\pm$ 0.500   | 1.500 $\pm$ 1.500  |
| Neo+DAPT     | 21.500 $\pm$ 6.384   | 5.750 $\pm$ 1.315   | 0.000 $\pm$ 0.000  |
| Neo+MP1+DAPT | 23.250 $\pm$ 8.499   | 6.500 $\pm$ 1.848   | 0.000 $\pm$ 0.000  |

Sup table 7: Number of EdU+ SCs in the greater epithelial ridge in the organ of Corti from the apex to the base under different treatment conditions (Data are shown as mean  $\pm$  SEM,  $n = 4$ ).

|              | Apex                 | Mid                  | Bas                |
|--------------|----------------------|----------------------|--------------------|
| Neo          | 0.250 $\pm$ 0.250    | 0.000 $\pm$ 0.000    | 0.000 $\pm$ 0.000  |
| Neo+MP1      | 7.500 $\pm$ 1.041    | 3.250 $\pm$ 0.750    | 1.000 $\pm$ 0.707  |
| Neo+BIO      | 178.000 $\pm$ 26.997 | 95.500 $\pm$ 21.411  | 0.750 $\pm$ 0.750  |
| Neo+MP1+BIO  | 160.000 $\pm$ 14.053 | 101.000 $\pm$ 14.445 | 0.000 $\pm$ 0.000  |
| Neo+DAPT     | 18.000 $\pm$ 6.014   | 2.750 $\pm$ 1.601    | 0.000 $\pm$ 0.000  |
| Neo+MP1+DAPT | 215.250 $\pm$ 32.227 | 115.750 $\pm$ 43.936 | 17.250 $\pm$ 7.192 |



Sup table 8: Number of EdU+ HCs in the organ of Corti from the apex to the base under different treatment conditions (Data are shown as mean  $\pm$  SEM,  $n = 4$ ).

|              | Apex               | Mid               | Bas               |
|--------------|--------------------|-------------------|-------------------|
| Neo          | 0.000 $\pm$ 0.000  | 0.000 $\pm$ 0.000 | 0.000 $\pm$ 0.000 |
| Neo+MP1      | 2.000 $\pm$ 0.707  | 2.250 $\pm$ 0.629 | 2.000 $\pm$ 0.816 |
| Neo+BIO      | 0.000 $\pm$ 0.000  | 0.250 $\pm$ 0.250 | 0.000 $\pm$ 0.000 |
| Neo+MP1+BIO  | 1.500 $\pm$ 0.957  | 1.750 $\pm$ 1.181 | 0.750 $\pm$ 0.479 |
| Neo+DAPT     | 38.000 $\pm$ 3.719 | 2.250 $\pm$ 1.109 | 0.000 $\pm$ 0.000 |
| Neo+MP1+DAPT | 39.250 $\pm$ 5.250 | 3.500 $\pm$ 1.323 | 0.000 $\pm$ 0.000 |
